# Supplementary material for: GeneCup: mining PubMed and GWAS catalog for gene–keyword relationships
Source: PubMed Central journal article supplement (PMC9073678; doi:10.1093/g3journal/jkac059), 2022-03-14
Supplement: jkac059_table_s1.pdf [file jkac059_table_s1.pdf]

**Supplementary Table 1.** Mini ontology for addiction related concepts

| Category  | Keywords       | Terms                                                                                                                                                                                                                   |
|-----------|----------------|-------------------------------------------------------------------------------------------------------------------------------------------------------------------------------------------------------------------------|
| Addiction | addiction      | addiction, addictive, compulsive, drug-abuse, escalation, punishment                                                                                                                                                    |
|           | aversion       | aversion, aversive, conditioned taste aversion, CTA                                                                                                                                                                     |
|           | dependence     | dependence                                                                                                                                                                                                              |
|           | intoxication   | binge, intoxication                                                                                                                                                                                                     |
|           | relapse        | craving, drug seeking, reinstatement, relapse, seeking                                                                                                                                                                  |
|           | reward         | conditioned place preference, CPP, drug reinforced, hedonic, ICSS, incentive, instrumental response, intracranial self-stimulation, operant, reinforcement, reinforcing, reward, self-administered, self-administration |
|           | sensitization  | sensitization                                                                                                                                                                                                           |
|           | withdrawal     | withdrawal                                                                                                                                                                                                              |
| Brain     | accumbens      | acbc, acbs, accumbal, accumbens, core, Nacc, NacSh, shell                                                                                                                                                               |
|           | amygdala       | amy, amygdala, bla, cea, cna                                                                                                                                                                                            |
|           | cortex         | cerebral, cingulate, cortex, cortico limbic, corticolimbic, corticostriatal, infralimbic, insula, insular, mPFC, orbitofrontal, pfc, prefrontal, prelimbic, prl, vmPFC                                                  |
|           | habenula       | habenula, lhb, mhb                                                                                                                                                                                                      |
|           | hippocampus    | ca1, ca3, dentate gyrus, dhpc, hip, hipp, hippocampal, hippocampus, subiculum, vhipp, vhpc                                                                                                                              |
|           | hypothalamus   | hypothalamic, hypothalamus, LHA, paraventricular nucleus, PVN                                                                                                                                                           |
|           | striatum       | basal ganglia, caudate, globus pallidus, GPI, putamen, STR, striatal, striatum                                                                                                                                          |
|           | VTA            | limbic, mesoaccumbal, mesoaccumbens, mesolimbic, midbrain, pvta, ventral tegmental, vta                                                                                                                                 |
|           | alcohol        | acamprosate, alcohol, alcoholic, alcoholics, alcoholism, antabuse, campral, disulfiram, ethanol, naltrexone, revia, vivitrol                                                                                            |
|           | amphetamine    | AMPH, amphetamine, METH, methamphetamine                                                                                                                                                                                |
|           | benzodiazepine | adinazolam, alprazolam, benzodiazepine, benzos, brotizolam, chlordiazepoxide, clonazepam, clobazam, clonazepam, clorazepate, diazepam, estazolam, flunitrazepam,                                                        |

|                      |                                                                                                                                                                                                        |                                                                                                                                                                                                                                                                                                                                                                                                                                    |
|----------------------|--------------------------------------------------------------------------------------------------------------------------------------------------------------------------------------------------------|------------------------------------------------------------------------------------------------------------------------------------------------------------------------------------------------------------------------------------------------------------------------------------------------------------------------------------------------------------------------------------------------------------------------------------|
| Drugs                |                                                                                                                                                                                                        | flurazepam, halazepam, librium, loprozalam, lorazepam, lormetazepam, midazolam, nimetazepam, nitrazepam, normison, oxazepam, prazepam, temazepam, triazolam, valium, xanax                                                                                                                                                                                                                                                         |
|                      | cannabinoid                                                                                                                                                                                            | acylethanolamines, cannabichromene, cannabidiol, cannabigerol, cannabinoid, cannabinoids, cannabinol, cannabis, cannabivarin, cesamet, drobinal, dronabinol, endocannabinoid, endocannabinoids, epidiolex, JWH-018, JWH-122, JWH-250, marijuana, marinol, nabilone, Oleoylethanolamide, palmitoylethanolamide, phytocannabinoid, rimonabant, SR141716, SR144528, syndros, tetrahydrocannabinol, tetrahydrocannabivarin, thc, thc-9 |
|                      | cocaine                                                                                                                                                                                                | cocaine                                                                                                                                                                                                                                                                                                                                                                                                                            |
|                      | nicotine                                                                                                                                                                                               | nicotine, smoker, smokers, smoking, tobacco                                                                                                                                                                                                                                                                                                                                                                                        |
|                      | opioid                                                                                                                                                                                                 | buprenorphine, codeine, fentanyl, heroin, hycodan, hydrocodone, hydromorphone, kadian, kratom, methadone, morphine, naloxone, opioid, opioids, oxycodone, oxycontin, percocet, suboxone, tramadol, ultram, vicodin                                                                                                                                                                                                                 |
| psychedelics         | ayahuasca, ecstasy, ibogaine, ketamine, LSD, lysergic acid diethylamide, MDMA, mescaline, methylenedioxymethamphetamine, N-methoxybenzyl, NBOMe, NBOMes, peyote, psilocybin, psychedelic, psychedelics |                                                                                                                                                                                                                                                                                                                                                                                                                                    |
| Molecular function   | neuroplasticity                                                                                                                                                                                        | boutons, epsc, epsp, IPSC, IPSP, long term depression, long term potentiation, LTD, LTP, mIPSC, neurite, neurogenesis, neuroplasticity, plasticity, synaptic                                                                                                                                                                                                                                                                       |
|                      | neurotransmission                                                                                                                                                                                      | 5-ht, acetylcholine, cholinergic, DAergic, dopamine, dopaminergic, GABA, GABAergic, glutamate, glutamatergic, muscarinic, neuropeptide, neuropeptides, neurotransmission, nicotinic, serotonergic, serotonin                                                                                                                                                                                                                       |
|                      | signalling                                                                                                                                                                                             | glycosylation, phosphorylation, signaling, signalling, kinase, binding, signal transduction, second messengers, cGMP, cAMP                                                                                                                                                                                                                                                                                                         |
|                      | transcription                                                                                                                                                                                          | histone, hypermethylation, hypomethylation, methylation, ribosome, transcription                                                                                                                                                                                                                                                                                                                                                   |
| Psychiatric diseases | anxiety                                                                                                                                                                                                | anxiety, anxious                                                                                                                                                                                                                                                                                                                                                                                                                   |
|                      | autism                                                                                                                                                                                                 | autism, autistic                                                                                                                                                                                                                                                                                                                                                                                                                   |
|                      | bipolar                                                                                                                                                                                                | bipolar disorder                                                                                                                                                                                                                                                                                                                                                                                                                   |
|                      | compulsive                                                                                                                                                                                             | compulsive, obsessive                                                                                                                                                                                                                                                                                                                                                                                                              |

|        |                 |                                                                                                                                                                                                                                                                                                                                                                                                                                                                                                                                                                                                                                                                                                                                                                                                                                                                                                                                                                                                                                                                                                                                                                                                                                                                                                                                                                |
|--------|-----------------|----------------------------------------------------------------------------------------------------------------------------------------------------------------------------------------------------------------------------------------------------------------------------------------------------------------------------------------------------------------------------------------------------------------------------------------------------------------------------------------------------------------------------------------------------------------------------------------------------------------------------------------------------------------------------------------------------------------------------------------------------------------------------------------------------------------------------------------------------------------------------------------------------------------------------------------------------------------------------------------------------------------------------------------------------------------------------------------------------------------------------------------------------------------------------------------------------------------------------------------------------------------------------------------------------------------------------------------------------------------|
|        | depression      | depression, depressive, major depressive disorder, MDD                                                                                                                                                                                                                                                                                                                                                                                                                                                                                                                                                                                                                                                                                                                                                                                                                                                                                                                                                                                                                                                                                                                                                                                                                                                                                                         |
|        | impulsivity     | 5-CSRTT, 5-choice task, delay discounting, delay exposure, delay intolerance, delayed reward, delay task, five choice serial reaction time task, impulsive, impulsivity, premature responding                                                                                                                                                                                                                                                                                                                                                                                                                                                                                                                                                                                                                                                                                                                                                                                                                                                                                                                                                                                                                                                                                                                                                                  |
|        | schizophrenia   | schizophrenia                                                                                                                                                                                                                                                                                                                                                                                                                                                                                                                                                                                                                                                                                                                                                                                                                                                                                                                                                                                                                                                                                                                                                                                                                                                                                                                                                  |
| Cell   | neuron          | adrenergic neuron, adrenergic neurons, cholinergic neuron, cholinergic neurons, dopaminergic neuron, dopaminergic neurons, gabaergic neuron, gabaergic neurons, glutamatergic neuron, glutamatergic neurons, GnRH neuron, GnRH neurons, interneuron, interneurons, monoaminergic neuron, monoaminergic neurons, medium spiny neuron, medium spiny neurons, motor neuron, motor neurons, neuronal cell, neuronal cells, nitrenergic neuron, nitrenergic neurons, noradrenergic neuron, noradrenergic neurons, projection neuron, projection neurons, pyramidal neuron, pyramidal neurons, sensory neuron, sensory neurons, serotonergic neuron, serotonergic neurons, somatostatin neuron, somatostatin neurons, neuron, neurons, excitatory neuron, excitatory neurons, inhibitory neuron, inhibitory neurons, corticospinal neuron, corticospinal neurons, dopamine neuron, dopamine neurons, D1 neuron, D1 neurons, afferent neuron, afferent neurons, efferent neuron, efferent neurons, serotonin neuron, serotonin neurons, cortical neuron, cortical neurons, hippocampal neuron, hippocampal neurons, DA neuron, DA neurons, CNS neuron, CNS neurons, cortex neuron, cortex neurons, mesencephalic neuron, mesencephalic neurons, orexin neuron, orexin neurons, catecholaminergic neuron, catecholaminergic neurons, striatal neuron, striatal neurons |
|        | astrocyte       | astrocyte, astrocytes, astrocytic, astroglia, astroglial                                                                                                                                                                                                                                                                                                                                                                                                                                                                                                                                                                                                                                                                                                                                                                                                                                                                                                                                                                                                                                                                                                                                                                                                                                                                                                       |
|        | microglia       | microglia, microglial                                                                                                                                                                                                                                                                                                                                                                                                                                                                                                                                                                                                                                                                                                                                                                                                                                                                                                                                                                                                                                                                                                                                                                                                                                                                                                                                          |
|        | endothelium     | endothelium, endothelial cell, endothelial cells                                                                                                                                                                                                                                                                                                                                                                                                                                                                                                                                                                                                                                                                                                                                                                                                                                                                                                                                                                                                                                                                                                                                                                                                                                                                                                               |
|        | oligodendrocyte | oligodendrocyte, oligodendrocytes                                                                                                                                                                                                                                                                                                                                                                                                                                                                                                                                                                                                                                                                                                                                                                                                                                                                                                                                                                                                                                                                                                                                                                                                                                                                                                                              |
| Stress | PTSD            | PTSD, post-traumatic stress, post-traumatic stress symptoms, post-traumatic stress disorder                                                                                                                                                                                                                                                                                                                                                                                                                                                                                                                                                                                                                                                                                                                                                                                                                                                                                                                                                                                                                                                                                                                                                                                                                                                                    |
|        | stress          | distress, psychological trauma, stress                                                                                                                                                                                                                                                                                                                                                                                                                                                                                                                                                                                                                                                                                                                                                                                                                                                                                                                                                                                                                                                                                                                                                                                                                                                                                                                         |
